# Supplementary material for: Mono-/Bi-valent anion resource recovery via electrodialysis using dual-side-chain functionalized poly(aryl ether sulfone) anion exchange membranes
Source: Royal Society of Chemistry journal article supplement (doi:10.1039/d5ta00759c), 2025-01-01
Supplement: d5ta00759c1.pdf [file d5ta00759c1.pdf]

## ***Supporting Information***

*for*

### **Mono-/Bi-valent Anion Resource Recovery via Electrodialysis Fabricated with Dual-Side-Chain Functionalized Poly(aryl ether sulfone) Anion Exchange Membranes**

Junbin Liao <sup>a,\*</sup>, Qishun Zhang <sup>a</sup>, Yu Xu <sup>a</sup>, Shiyu Zhou <sup>a</sup>, Yifan Xu <sup>a</sup>, Wenlong Ding <sup>a</sup>,  
Zhiqiang Wu <sup>a</sup>, Haoyu Liu <sup>a</sup>, Yanqing Xu <sup>a</sup>, Huimin Ruan <sup>a</sup>, Jiangnan Shen <sup>a,\*</sup>

<sup>a</sup> College of Chemical Engineering, Zhejiang University of Technology, Hangzhou  
310014, China.

\* Corresponding Authors: Junbin Liao (E-mail: [jbliao@zjut.edu.cn](mailto:jbliao@zjut.edu.cn)); Jiangnan Shen (E-mail: [shenjn@zjut.edu.cn](mailto:shenjn@zjut.edu.cn)).

#### **1. Materials and Chemicals**

A commercial CEM Type-II was received from FUJI film Corp. (Japan). (Surface area resistance:  $3.55 \Omega \cdot \text{cm}^2$ ; IEC:  $2.03 \text{ mmol} \cdot \text{g}^{-1}$ , tested in 0.5 M NaCl (aq.); and thickness ca.  $165 \mu\text{m}$ ). Commercial anion selective Neosepta AMX (Surface area resistance:  $2.85 \Omega \cdot \text{cm}^2$ ; IEC:  $1.62 \text{ mmol} \cdot \text{g}^{-1}$ , tested in 0.5 M NaCl (aq.); and thickness ca.  $170 \mu\text{m}$ ) was obtained from Tokuyama Co-ASTOM Japan.

#### **2. Thermogravimetric Analysis (TGA)**

Thermal gravimetric analysis (TGA) experiments were performed using a SDT Q600 V8.2 Build100 thermogravimetric analyzer under a flow of  $\text{N}_2$ .

#### **3. Surface Area Resistance**

Prior to testing, the AEM samples were immersed in 0.5 M NaCl (aqueous) solution for 12 h. The samples were then placed between two custom-made compartments filled with

0.5 M NaCl (aqueous) solution. These compartments were connected to a conductivity meter to measure and record the conductivity value. The surface area resistance was calculated using Equation (1):

$$R = \frac{1000}{\lambda_0} - \frac{1000}{\lambda_1} \quad (1)$$

where  $R$  ( $\Omega \cdot \text{cm}^2$ ) is the surface area resistance, the  $\lambda_0$  (mS/cm) is the ion conductivity across the membrane on both sides, and  $\lambda_1$  (mS/cm) is the blanking ion conductivity.

#### 4. Ion Exchange Capacity and Limiting Current Density

Ion exchange capacity (IEC) serves as a crucial parameter for quantifying the density of ion exchange groups within the IEM. In the case of AEM in  $\text{Cl}^-$  form, the IEC was determined through titration. The AEM was immersed in 0.5 M NaCl aqueous solution to ensure complete replacement of  $\text{Br}^-$  ions with  $\text{Cl}^-$  ions. After 24 h, the IEM was extracted and any residual NaCl solution on the surface was thoroughly rinsed off with deionized (DI) water. Subsequently, it was exposed to 60 mL of 0.5 M  $\text{Na}_2\text{SO}_4$  solution for another 24 h. This process led to complete release of  $\text{Cl}^-$  from the AEM into the solution. The concentration of  $\text{Cl}^-$  was determined *via* titration using 0.05 M  $\text{AgNO}_3$  solution with  $\text{K}_2\text{CrO}_4$  as the indicator. Finally, the IECs of the AEMs were calculated using the provided Equations (3).

$$IEC = \frac{V \times c_{\text{Cl}^-}}{m} \quad (2)$$

where  $V$  (mL) is the volume of  $\text{Na}_2\text{SO}_4$  (aq.) used to soak the sample,  $c_{\text{Cl}^-}$  (M) is the chloride ion concentration in the  $\text{Na}_2\text{SO}_4$  (aq.) after soaking the sample,  $m$  (g) is the mass of sample.

The limiting current density was determined by analyzing the current-voltage curves of the prepared AEMs. The same equipment used for surface area resistance testing was employed for this purpose. During the test, the current range was set from 0 to 0.2 A with a current gradient of 0.01 A. Notably, the two central compartments were filled with 0.05 M NaCl solution, while the electrode chamber was filled with 0.3 M Na<sub>2</sub>SO<sub>4</sub> solution.

### 5. Evaluation of Cl<sup>-</sup>/SO<sub>4</sub><sup>2-</sup> Ion Separation

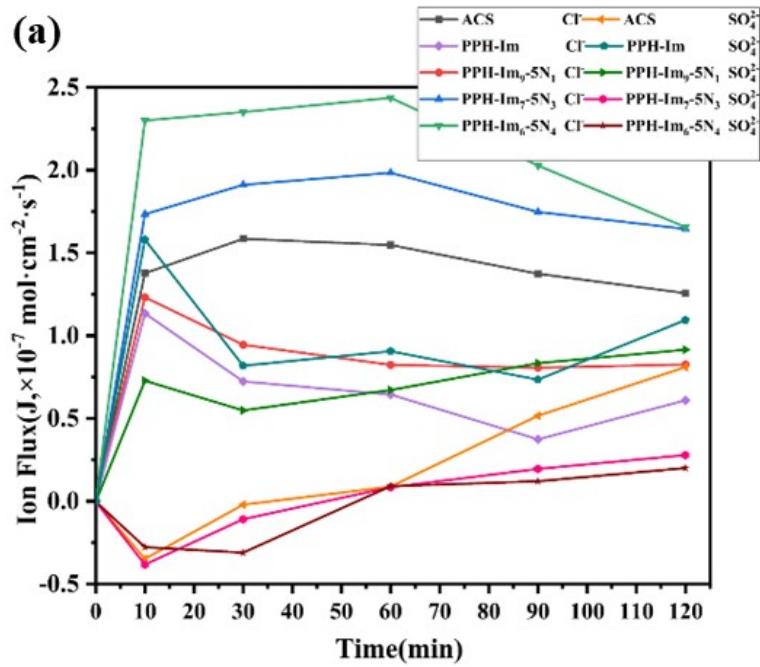

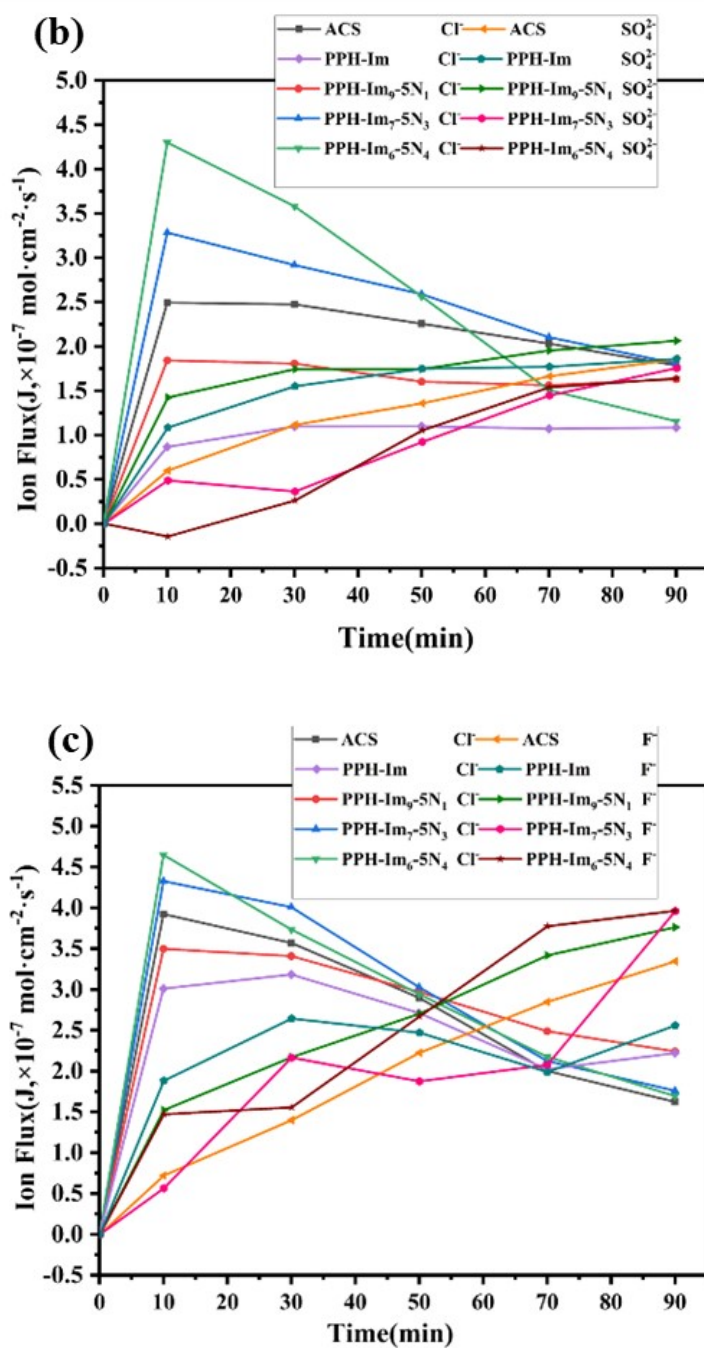

**Figure S1.** (a) Ion Flux of Cl<sup>-</sup>, SO<sub>4</sub><sup>2-</sup> ions in DCs of EDs with PPH-sIm<sub>10-X</sub>-5N<sub>X</sub> (X = 0, 1, 3, 4) at 2.5 mA·cm<sup>-2</sup>. (b) Ion Flux of Cl<sup>-</sup>, SO<sub>4</sub><sup>2-</sup> in DCs of EDs with PPH-sIm<sub>10-X</sub>-5N<sub>X</sub> at 5.0 mA·cm<sup>-2</sup>. (c) Ion Flux of Cl<sup>-</sup> and F<sup>-</sup> in DCs of EDs with PPH-sIm<sub>10-X</sub>-5N<sub>X</sub> at 5.0 mA·cm<sup>-2</sup>.

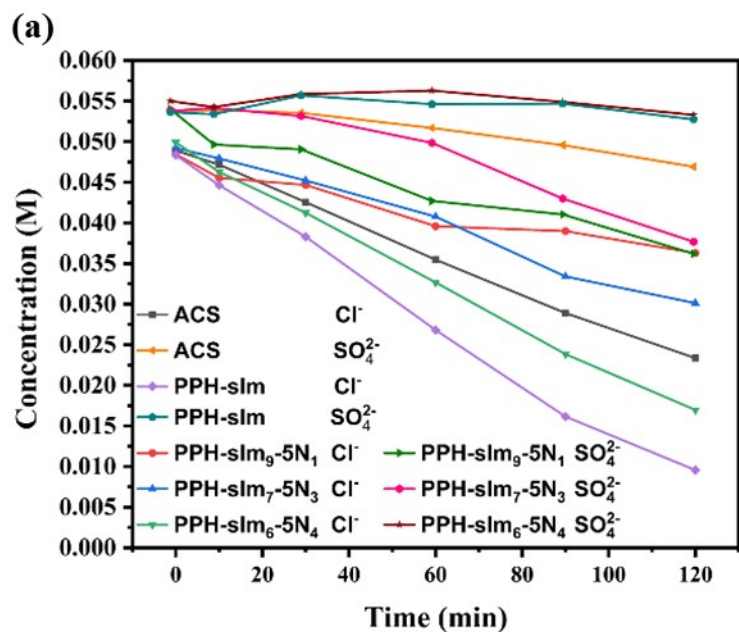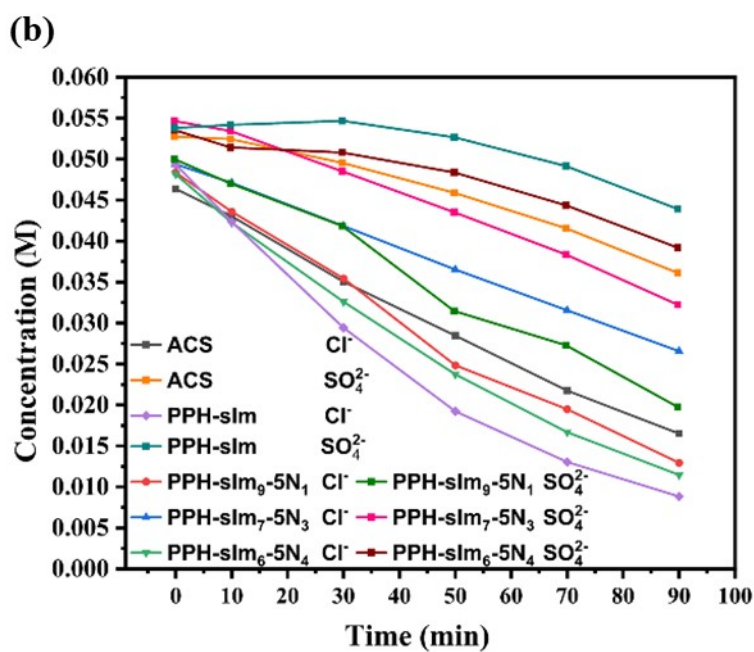

**Figure S2.** (a) Concentration evolution of Cl<sup>-</sup>, SO<sub>4</sub><sup>2-</sup> ions in DCs of EDs with PPH-sIm<sub>10-X</sub>-5N<sub>X</sub> at 2.5 mA·cm<sup>-2</sup>. (b) Concentration evolution of Cl<sup>-</sup>, SO<sub>4</sub><sup>2-</sup> ions in DCs of Eds with PPH-sIm<sub>10-X</sub>-5N<sub>X</sub> at 5 mA·cm<sup>-2</sup>. multiple tests.

## 6. Dynamics simulation under electric field

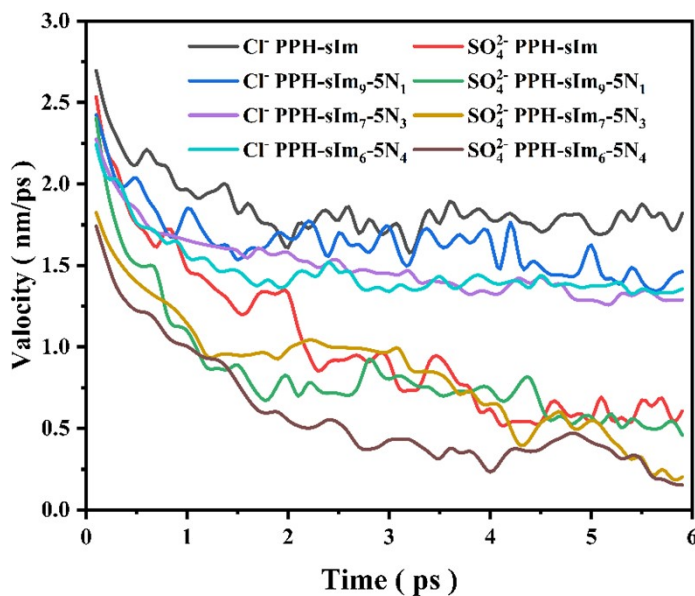

**Figure S3** Velocity of  $\text{Cl}^-$  and  $\text{SO}_4^{2-}$  ions passing through PPH-sIm<sub>10-X</sub>-5N<sub>X</sub> (X = 0, 1, 3, and 4) under the driving force in electric field (unfit).

## 7. Comparison of Selectivity with Previously Reported Membranes

Table S1. Comparison of perm-selectivity ( $P_{\text{SO}_4^{2-}}^{\text{Cl}^-}$ ) of PPH-sIm<sub>6</sub>-5N<sub>4</sub> AEM with those from some typical reported mono-/bi-valent anion selective IEMs.

| AEMs                                  | Anion types                                              | Current density                  | $P_{\text{SO}_4^{2-}}^{\text{Cl}^-}$ | Ref       |
|---------------------------------------|----------------------------------------------------------|----------------------------------|--------------------------------------|-----------|
| PDA/(Fe)PAA-M                         | 0.1 M $\text{Na}_2\text{SO}_4$ and 0.1 M $\text{NaCl}$   | 5 $\text{mA}\cdot\text{cm}^{-2}$ | 5.6                                  | 1         |
| sCOF/aAEM3                            | 0.05 M $\text{Na}_2\text{SO}_4$ and 0.05 M $\text{NaCl}$ | 5 $\text{mA}\cdot\text{cm}^{-2}$ | 18.92                                | 2         |
| AIEM-12C                              | 0.05 M $\text{Na}_2\text{SO}_4$ and 0.05 M $\text{NaCl}$ | 5 $\text{mA}\cdot\text{cm}^{-2}$ | 22.51                                | 3         |
| IM-PAES-sIM                           | 0.05 M $\text{Na}_2\text{SO}_4$ and 0.05 M $\text{NaCl}$ | 5 $\text{mA}\cdot\text{cm}^{-2}$ | 9.52                                 | 4         |
| PPH-sIm <sub>6</sub> -5N <sub>4</sub> | 0.05 M $\text{Na}_2\text{SO}_4$ and 0.05 M $\text{NaCl}$ | 5 $\text{mA}\cdot\text{cm}^{-2}$ | 26.27                                | This work |

1. S. Chen, M. Tian, W. zhang, B. Hu and H. Deng, *Separation and Purification Technology*, 2024, **347**.
2. Y. Wang, L. Ren, J. Wang, J. Zhao and Q.-B. Chen, *Journal of Membrane Science*,

2022, **659**.

3. J. Li, X. Chen, J. Liao, Y. Li, J. Mu, Y. Xu, Y. Du, H. Ruan, X. Xu and J. Shen, *Separation and Purification Technology*, 2024, **328**.

4. Q. Chen, Y. Yao, J. Liao, J. Li, J. Xu, T. Wang, Y. Tang, Y. Xu, H. Ruan and J. Shen, *ACS Nano*, 2022, **16**, 4629-4641.
